# Supplementary material
Source: PubMed Central journal article supplement (PMC6856423)
Supplement: NIHMS1527862-supplement-1.pdf [file NIHMS1527862-supplement-1.pdf]

**Supplemental Table 1. Association of physical abuse measured by the Conflict Tactics Scale (CTS) with risk of incident SLE in NHS II (N=67,480)**

| <b>Conflict Tactics Scale Response</b>                                                                                                                                | <b>SLE Cases/person-years</b> | <b>Age and race-adjusted model HR (95% CI)</b> | <b>Parental and childhood-factor adjusted model* HR (95% CI)</b> |
|-----------------------------------------------------------------------------------------------------------------------------------------------------------------------|-------------------------------|------------------------------------------------|------------------------------------------------------------------|
| None                                                                                                                                                                  | 34/769,805                    | <i>Ref.</i>                                    | <i>Ref.</i>                                                      |
| Low                                                                                                                                                                   | 17/333,488                    | 1.13 (0.63-2.03)                               | 1.12 (0.63-2.02)                                                 |
| Moderate/High                                                                                                                                                         | 43/546,000                    | <b>1.74 (1.11-2.73)</b>                        | <b>1.64 (1.04-2.59)</b>                                          |
| p for trend                                                                                                                                                           |                               | <b>p=0.01</b>                                  | <b>p=0.03</b>                                                    |
| *Model adjusted for age, race, maternal and paternal occupation, parental education, parental home ownership, birthweight, age at menarche, somatogram score at age 5 |                               |                                                |                                                                  |
